# Supplementary material
Source: HighWire-hosted journal article supplement (https://gut.bmj.com/content/69/6/997)
Supplement: inline-supplementary-material-1 [file inline-supplementary-material-1.pdf]

## Gastrointestinal Symptoms of 95 Cases with SARS-CoV-2 Infection

Lu Lin<sup>1\*</sup>, Xiayang Jiang<sup>1\*</sup>, Zhenling Zhang<sup>1</sup>, Siwen Huang<sup>1</sup>, Zhenyi Zhang<sup>1</sup>, Zhaoxiong Fang<sup>1</sup>, Zhiqiang Gu<sup>1</sup>, Liangqing Gao<sup>1</sup>, Honggang Shi<sup>1</sup>, Lei Mai<sup>1</sup>, Yuan Liu<sup>1</sup>, Xianqi Lin<sup>1</sup>, Renxu Lai<sup>1</sup>, Zhixiang Yan<sup>2#</sup>, Xiaofeng Li<sup>1#</sup>, Hong Shan<sup>2,3#</sup>

### Author Affiliations

<sup>1</sup> Department of Gastroenterology, the Fifth Affiliated Hospital, Sun Yat-sen University, Zhuhai, Guangdong Province, China

<sup>2</sup> Guangdong Provincial Key Laboratory of Biomedical Imaging and Guangdong Provincial Engineering Research Center of Molecular Imaging, the Fifth Affiliated Hospital, Sun Yat-sen University, Zhuhai, Guangdong Province, China

<sup>3</sup> Center for Interventional Medicine, the Fifth Affiliated Hospital, Sun Yat-sen University, Zhuhai, Guangdong Province, China

\* These authors contributed equally to this work.

# Correspondence to

Professor Hong Shan, Guangdong Provincial Key Laboratory of Biomedical Imaging and Guangdong Provincial Engineering Research Center of Molecular Imaging, the Fifth Affiliated Hospital, Sun Yat-sen University, Zhuhai, Guangdong Province 519000, China; [shanhong@mail.sysu.edu.cn](mailto:shanhong@mail.sysu.edu.cn);

Dr Xiaofeng Li, Department of Gastroenterology, the Fifth Affiliated Hospital, Sun Yat-sen University, Zhuhai, Guangdong Province 519000, China; [zdwylxf@163.com](mailto:zdwylxf@163.com);

Dr Zhixiang Yan, Guangdong Provincial Key Laboratory of Biomedical Imaging and Guangdong Provincial Engineering Research Center of Molecular Imaging, the Fifth Affiliated Hospital, Sun Yat-sen University, Zhuhai, Guangdong Province 519000, China; [yanzhix3@mail.sysu.edu.cn](mailto:yanzhix3@mail.sysu.edu.cn)

**Table S1.** Gastrointestinal manifestations of 11 SARS-CoV-2 infected patients without imaging features of COVID-19 pneumonia

|                                    | <b>All patients<br/>(n=11)</b> | <b>On initial<br/>presentation (n=3)</b> | <b>During<br/>hospitalization (n=8)</b> |
|------------------------------------|--------------------------------|------------------------------------------|-----------------------------------------|
| <b>Symptoms</b>                    |                                |                                          |                                         |
| Diarrhea                           | 4                              | 2                                        | 2                                       |
| Anorexia                           | 2                              | 0                                        | 2                                       |
| Nausea                             | 2                              | 0                                        | 2                                       |
| Vomiting                           | 0                              | 0                                        | 0                                       |
| Acid reflux                        | 0                              | 0                                        | 0                                       |
| Epigastric discomfort              | 1                              | 0                                        | 1                                       |
| Upper gastrointestinal hemorrhage  | 0                              | 0                                        | 0                                       |
| <b>Hepatic function impairment</b> | 7                              | 1                                        | 6                                       |
| Bilirubin                          | 5                              | 0                                        | 5                                       |
| ALT or AST                         | 2                              | 1                                        | 1                                       |

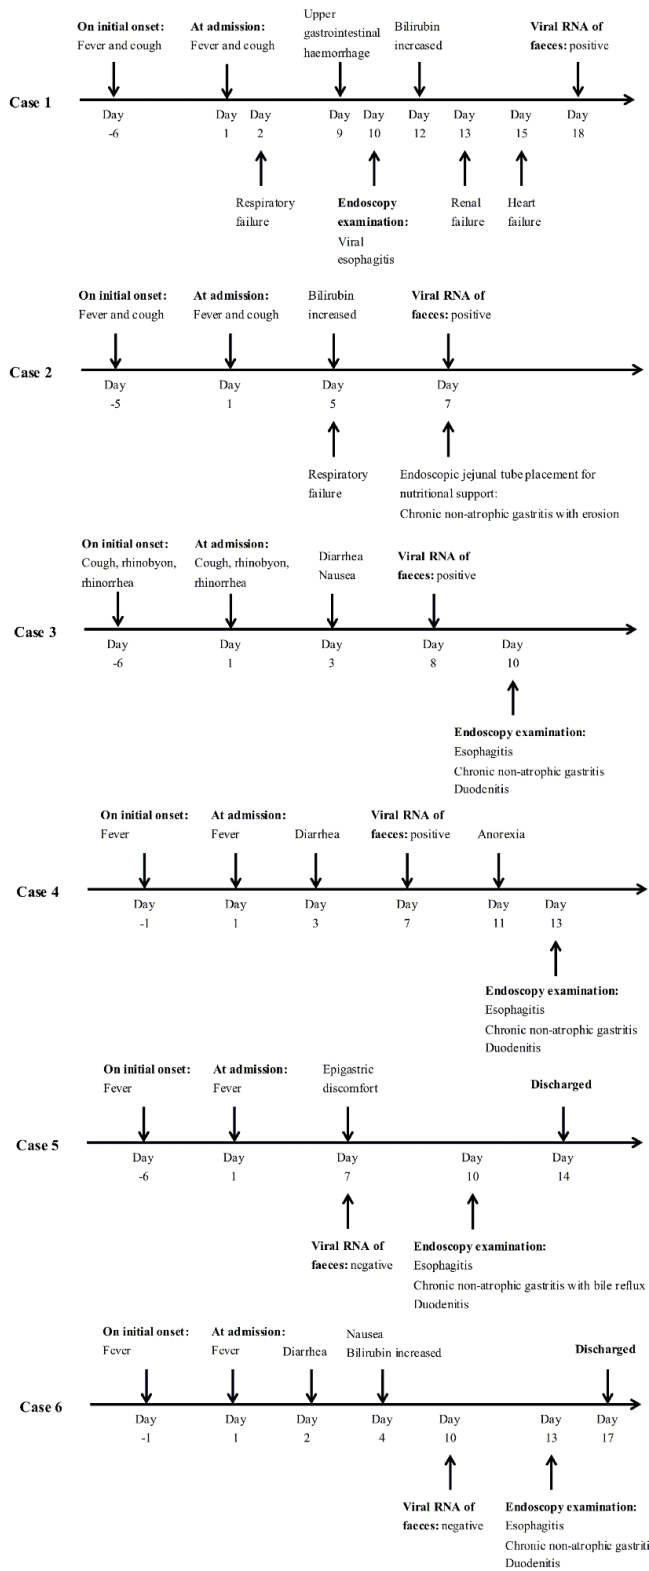

**Figure S1.** Clinical timeline for six patients subjected to endoscopic examination
